# Supplementary material for: Nutritional Evaluation and Risk Assessment of the Exposure to Essential and Toxic Elements in Dogs and Cats through the Consumption of Pelleted Dry Food: How Important Is the Quality of the Feed?
Source: MDPI journal article supplement (doi:10.3390/toxics9060133), 2021-06-05
Supplement: s1 [file s1]

## Article

# Supplementary Materials: Nutritional Evaluation and Risk Assessment of the Exposure to Essential and Toxic Elements in Dogs and Cats through the Consumption of Pelleted Dry Food: How Important Is the Quality of the Feed?

Ana Macías-Montes, Manuel Zumbado, Octavio P. Luzardo, Ángel Rodríguez-Hernández, Andrea Acosta-Dacal, Cristian Rial-Berriel, Luis D. Boada and Luis Alberto Henríquez-Hernández

**Table S1.** Complete list of elements included in the study. LOD, LOQ, DRV, TRV and maximum permitted content were included.

| Essential elements                                               | Sym-<br>bol | LOD<br>(ng/g) | LOQ<br>(ng/g) | DRV (ng/kg/day)<br>(1) |                                          |
|------------------------------------------------------------------|-------------|---------------|---------------|------------------------|------------------------------------------|
| Copper                                                           | Cu          | 0.4           | 1.7           | 380000                 |                                          |
| Iron                                                             | Fe          | 5             | 24.6          | 3050000                |                                          |
| Manganese                                                        | Mn          | 0.1           | 0.4           | 190000                 |                                          |
| Selenium                                                         | Se          | 0.05          | 0.2           | 12550                  |                                          |
| Zinc                                                             | Zn          | 5             | 51.1          | 3410000                |                                          |
| ATSDR's Priority Pollutant list                                  |             |               |               |                        |                                          |
| Toxic Elements                                                   |             |               |               | TRV (ng/kg/day)<br>(2) | Maximum Permitted Content (mg/kg)<br>(3) |
| Arsenic (inorganic)                                              | iAs         | 0.05          | 0.2           | 300                    | 2                                        |
| Cadmium                                                          | Cd          | 0.02          | 0.1           | 1000                   | 10                                       |
| Mercury (methyl)                                                 | MeHg        | 0.02          | 0.2           | 100                    | 0.1                                      |
| Lead                                                             | Pb          | 0.1           | 0.4           | 6000                   | 2                                        |
| Potentially toxic elements                                       |             |               |               |                        |                                          |
| Silver                                                           | Ag          | 0.05          | 0.1           | 5000                   |                                          |
| Aluminium                                                        | Al          | 7.5           | 38.4          | 1000000                |                                          |
| Barium                                                           | Ba          | 0.2           | 1             | 200000                 |                                          |
| Beryllium                                                        | Be          | 0.05          | 0.1           | 2000                   |                                          |
| Molybdenum                                                       | Mo          | 0.05          | 0.2           | 5000                   |                                          |
| Nickel                                                           | Ni          | 1             | 8             | 20000                  |                                          |
| Antimony                                                         | Sb          | 0.05          | 0.1           | 400                    |                                          |
| Tin                                                              | Sn          | 0.05          | 0.1           | 600000                 |                                          |
| Strontium                                                        | Sr          | 0.1           | 0.5           | 600000                 |                                          |
| Thallium                                                         | Tl          | 0.05          | 0.1           |                        |                                          |
| Uranium                                                          | U           | 0.05          | 0.1           | 3000                   |                                          |
| Vanadium                                                         | V           | 0.05          | 0.1           | 1000                   |                                          |
| Rare Earth Elements and<br>Elements Used in High Tech<br>Devices |             |               |               |                        |                                          |
| Cerium                                                           | Ce          | 0.05          | 0.1           |                        |                                          |
| Dysprosium                                                       | Dy          | 0.05          | 0.1           |                        |                                          |
| Erbium                                                           | Er          | 0.05          | 0.1           |                        |                                          |
| Europium                                                         | Eu          | 0.05          | 0.1           |                        |                                          |
| Gallium                                                          | Ga          | 0.05          | 0.1           |                        |                                          |

|              |    |      |     |
|--------------|----|------|-----|
| Gadolinium   | Gd | 0.05 | 0.1 |
| Holmium      | Ho | 0.05 | 0.1 |
| Indium       | In | 0.05 | 0.1 |
| Lanthanum    | La | 0.05 | 0.1 |
| Lutetium     | Lu | 0.05 | 0.1 |
| Niobium      | Nb | 0.05 | 0.1 |
| Neodymium    | Nd | 0.05 | 0.1 |
| Osmium       | Os | 0.05 | 0.1 |
| Praseodymium | Pr | 0.05 | 0.1 |
| Platinum     | Pt | 0.05 | 0.1 |
| Ruthenium    | Ru | 0.05 | 0.1 |
| Samarium     | Sm | 0.05 | 0.1 |
| Tantalum     | Ta | 0.05 | 0.1 |
| Terbium      | Tb | 0.05 | 0.1 |
| Thulium      | Tm | 0.05 | 0.1 |
| Yttrium      | Y  | 0.05 | 0.1 |
| Ytterbium    | Yb | 0.05 | 0.1 |

Sum REE

61000 (4)

(1) DRVs were obtained from National Research Council (2006) Nutrient requirements of dogs and cats. (2) TRVs were obtained at EPA - Integrated Risk Information System, available at <https://www.epa.gov/iris>. (3) Maximum permitted content in products intended for animal food was obtained from Directive 2002/32/EC. (4) TRV for the sum of RRE was obtained from: Sci Rep 2017, 7, 9772; and Chemosphere 2017, 168,578-582.

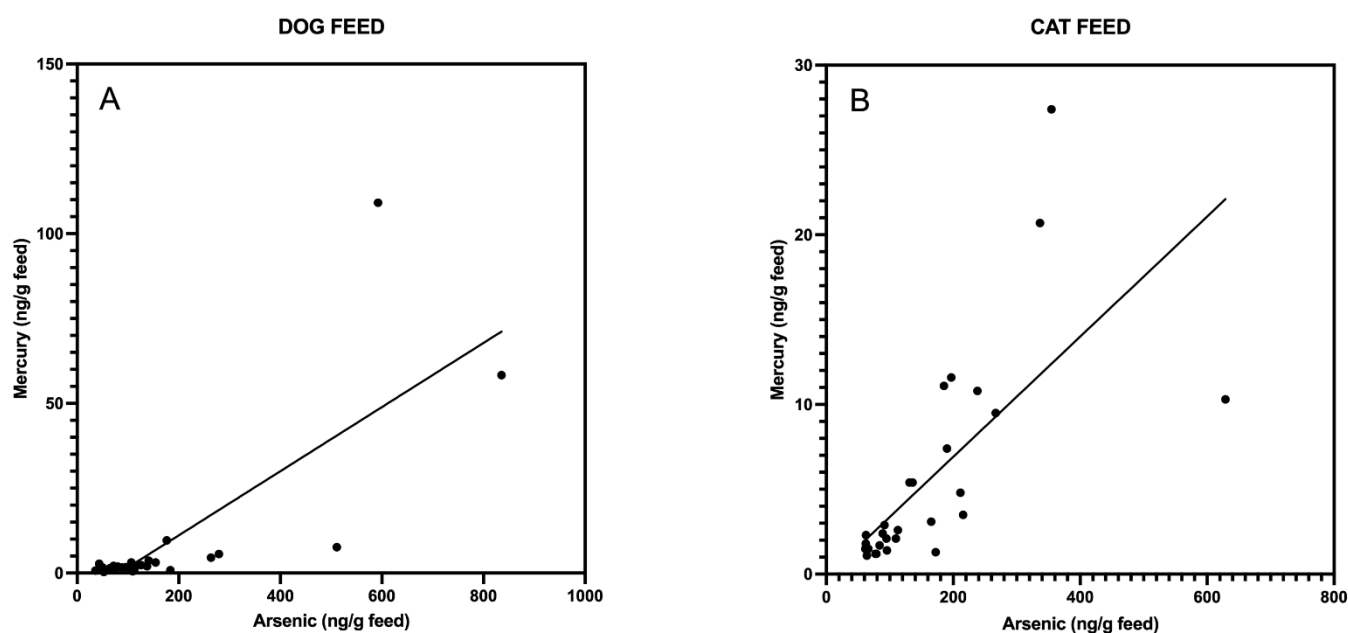

**Figure S1.** Bivariate correlation between the concentration of arsenic and mercury in dog (A) and cat (B) feed.
